# Supplementary material for: Determination of formaldehyde residue in cosmetics by short-column high performance liquid chromatography with mass spectrometric confirmation
Source: Royal Society of Chemistry journal article supplement (doi:10.1039/c4ay02546f), 2014-12-23
Supplement: c4ay02546f1.pdf [file c4ay02546f1.pdf]

## Electronic Supplementary Information

Table S1 Methods for formaldehyde determination by HPLC

| Separation column                                                  | Mobile phase & flow rate                                                               | Detector                                          | Retention time (min)                     | Detection limit ( $\mu\text{g L}^{-1}$ ) | Sample                      | Ref.      |
|--------------------------------------------------------------------|----------------------------------------------------------------------------------------|---------------------------------------------------|------------------------------------------|------------------------------------------|-----------------------------|-----------|
| Symmetry C <sub>18</sub> (150 mm×4.6 mm, 5 $\mu\text{m}$ )         | 50% acetonitrile + 4 mM NaH <sub>2</sub> PO <sub>4</sub> , 1.0 mL min <sup>-1</sup>    | UV at 360 nm, Injection: 20 $\mu\text{L}$         | 6.1                                      | 0.06                                     | textile                     | 13        |
| Zorbax C <sub>18</sub> (250 mm×4.6 mm, 5 $\mu\text{m}$ )           | 60% acetonitrile, 1.0 mL min <sup>-1</sup>                                             | UV at 355 nm, Injection: 10 $\mu\text{L}$         | 7.8                                      | 15                                       | cosmetics                   | 14        |
| Eclipse XDB C <sub>18</sub> (150 mm×4.6 mm, 5 $\mu\text{m}$ )      | 60% acetonitrile, 1.0 mL min <sup>-1</sup>                                             | UV at 365 nm, Injection: 20 $\mu\text{L}$         | 16.0                                     | 3.3                                      | hair-straightening products | 15        |
| Zorbax C <sub>18</sub> (150 mm×0.5 mm, 5 $\mu\text{m}$ )           | 0-15min, 45% acetonitrile, 0.01 mL min <sup>-1</sup>                                   | ESI-MS at m/z 209, Injection: 2 $\mu\text{L}$     | 12.1                                     | 0.008                                    | PM <sub>2.5</sub>           | 16        |
|                                                                    | 15-25min, 65% acetonitrile, 0.015 mL min <sup>-1</sup>                                 |                                                   |                                          |                                          |                             |           |
|                                                                    | 25-30min, 100% acetonitrile, 0.015 mL min <sup>-1</sup>                                |                                                   |                                          |                                          |                             |           |
|                                                                    | 30-35min, 45% acetonitrile, 0.01 mL min <sup>-1</sup>                                  |                                                   |                                          |                                          |                             |           |
| Spherisorb C <sub>18</sub> (124 mm×4 mm, 2.5 $\mu\text{m}$ )       | 60% acetonitrile, 1 mL min <sup>-1</sup>                                               | UV at 360 nm, Injection: 20 $\mu\text{L}$         | 2.6                                      | 0.3                                      | polyethylene terephthalate  | 17        |
| C <sub>18</sub> (250 mm×4.6 mm, 5 $\mu\text{m}$ )                  | 45% acetonitrile, 1.0 mL min <sup>-1</sup>                                             | UV at 345 nm, Injection: 10 $\mu\text{L}$         | 2.9                                      | Unkown                                   | perfume                     | 18        |
| Zorbax Bonus-RP C <sub>18</sub> (250 mm×4.6 mm, 5 $\mu\text{m}$ )  | 75% methanol, 1.0 mL min <sup>-1</sup>                                                 | UV at 360 nm, Injection: 10 $\mu\text{L}$         | 5.1                                      | 6.0                                      | fruit juice                 | 19        |
| Hypersil C <sub>18</sub> (250 mm×4.6 mm, 5 $\mu\text{m}$ )         | 60% acetonitrile + 0.5% acetic acid, 1.0 mL min <sup>-1</sup>                          | UV at 352 nm, Injection: 20 $\mu\text{L}$         | 5.4                                      | 0.6                                      | beer                        | 20        |
| XDB C <sub>18</sub> (150 mm×4.6 mm, 5 $\mu\text{m}$ )              | 60% acetonitrile, 1.0 mL min <sup>-1</sup>                                             | UV at 352 nm, Injection: 20 $\mu\text{L}$         | 3.5                                      | 0.12                                     | beverage                    | 21        |
| Lichrospher C <sub>18</sub> (250 mm×4.6 mm, 5 $\mu\text{m}$ )      | 65% acetonitrile, 0.8 mL min <sup>-1</sup>                                             | UV at 365 nm, Injection: 20 $\mu\text{L}$         | 6.8                                      | Unkown                                   | octopus                     | 22        |
| Ultrasphere I.P. C <sub>18</sub> (250 mm×4.6 mm, 5 $\mu\text{m}$ ) | 75 mM NaH <sub>2</sub> PO <sub>4</sub> + 1mM sodium octyl sulphate + 500 $\mu\text{M}$ | ECL, Injection: 50 $\mu\text{L}$                  | 6.6                                      | Unkown                                   | urine and tissue            | 23        |
|                                                                    | EDTA + 10% (v/v) acetonitrile (pH 2.75), 1.0 mL min <sup>-1</sup>                      |                                                   |                                          |                                          |                             |           |
| Hamilton PRP-1 (150 mm×4.6 mm, 5 $\mu\text{m}$ )                   | 50% acetonitrile, 0.5 mL min <sup>-1</sup>                                             | UV at 410 nm, Injection: 50 $\mu\text{L}$         | 4.5                                      | 400                                      | No                          | 24        |
| Zorbax SB C <sub>18</sub> (250 mm×4.6 mm, 5 $\mu\text{m}$ )        | 25% acetonitrile, 1.0 mL min <sup>-1</sup>                                             | FL at 346 and 422 nm, Injection: 10 $\mu\text{L}$ | 9.0                                      | 0.46                                     | plasma                      | 25        |
| Inertsil ODS-P C <sub>18</sub> (250 mm×4.6 mm, 5 $\mu\text{m}$ )   | 70% acetonitrile, 1.2 mL min <sup>-1</sup>                                             | UV at 352 nm, Injection: 20 $\mu\text{L}$         | 4.2                                      | 5                                        | shiitake mushroom           | 26        |
| Nova-Pak C <sub>18</sub> (150 mm×3.9 mm, 4 $\mu\text{m}$ )         | 70% methanol, 1.0 mL min <sup>-1</sup>                                                 | UV at 365 nm, Injection: 20 $\mu\text{L}$         | 3.1                                      | 0.024                                    | spirit                      | 27        |
| Hypersil C <sub>18</sub> (150 mm×4.6 mm, 5 $\mu\text{m}$ )         | 60% acetonitrile, 1.0 mL min <sup>-1</sup>                                             | UV at 360 nm, Injection: 20 $\mu\text{L}$         | 3.9                                      | 51                                       | acetone                     | 28        |
| Hypersil C <sub>18</sub> (250 mm×4.6 mm, 5 $\mu\text{m}$ )         | 35% acetonitrile → 90% acetonitrile, 1.5 mL min <sup>-1</sup>                          | UV at 3650 nm, Injection: 100 $\mu\text{L}$       | 11.8                                     | Unkown                                   | water-soluble polymers      | 29        |
| Symmetry C <sub>18</sub> (150 mm×4.6 mm, 5 $\mu\text{m}$ )         | 50% acetonitrile, 1.0 mL min <sup>-1</sup>                                             | UV at 352 nm, Injection: 20 $\mu\text{L}$         | ≈10.0                                    | 0.27                                     | aquatic products            | 30        |
| Chromolith monolithic C <sub>18</sub> (100 mm×4.6 mm)              | 41% acetonitrile → 74.3% acetonitrile, 1.0 mL min <sup>-1</sup>                        | UV at 365 nm, Injection: 20 $\mu\text{L}$         | 1.2                                      | 8                                        | sugar cane spirits          | 31        |
|                                                                    | C <sub>18</sub> (12.5 mm×4.6 mm, 5 $\mu\text{m}$ )                                     | 50% methanol, 1.5 mL min <sup>-1</sup>            | UV at 355 nm, Injection: 1 $\mu\text{L}$ | 0.3                                      | 5                           | cosmetics |

Abbreviations: ultra-violet (UV); electrochemoluminescence (ECL); electrospray ionization mass spectrometry (ESI-MS); fluorescence (FL).
